## **LncRNA de novo discovery reveals noncoding RNAs as major molecular mechanism associating coronary artery disease GWAS variants with causal genes to confer disease risk**

Milos Pjanic<sup>\*1</sup>, Quanyi Zhao<sup>\*1</sup>, Paul Cheng<sup>1</sup>, Trieu Nguyen<sup>1</sup>, Robert C. Wirka<sup>1</sup>, Juyong Brian Kim<sup>1</sup>, Clint L. Miller<sup>2</sup>, Thomas Quertermous<sup>1</sup>

\*denotes equal contribution

1) Division of Cardiovascular Medicine and Cardiovascular Institute, School of Medicine, Stanford University, 300 Pasteur Dr., Falk CVRC, Stanford, CA 94305 USA

2) Center for Public Health Genomics, Department of Public Health Sciences, University of Virginia, Charlottesville, VA, USA.

This paper has been removed owing to copyright violation.
